# Supplementary material for: Analysis of Tumor Microenvironment Changes after Neoadjuvant Chemotherapy with or without Bevacizumab in Advanced Ovarian Cancer (GEICO-89T/MINOVA Study)
Source: PubMed Central journal article supplement — Clin Cancer Res. 2023 Aug 1;30(1):176–86. doi: 10.1158/1078-0432.CCR-23-0771 (PMC10767307; doi:10.1158/1078-0432.ccr-23-0771), 2023-08-01
Supplement: ccr-23-0771_figure_s2_suppfs2.pdf [file ccr-23-0771_figure_s2_suppfs2.pdf]

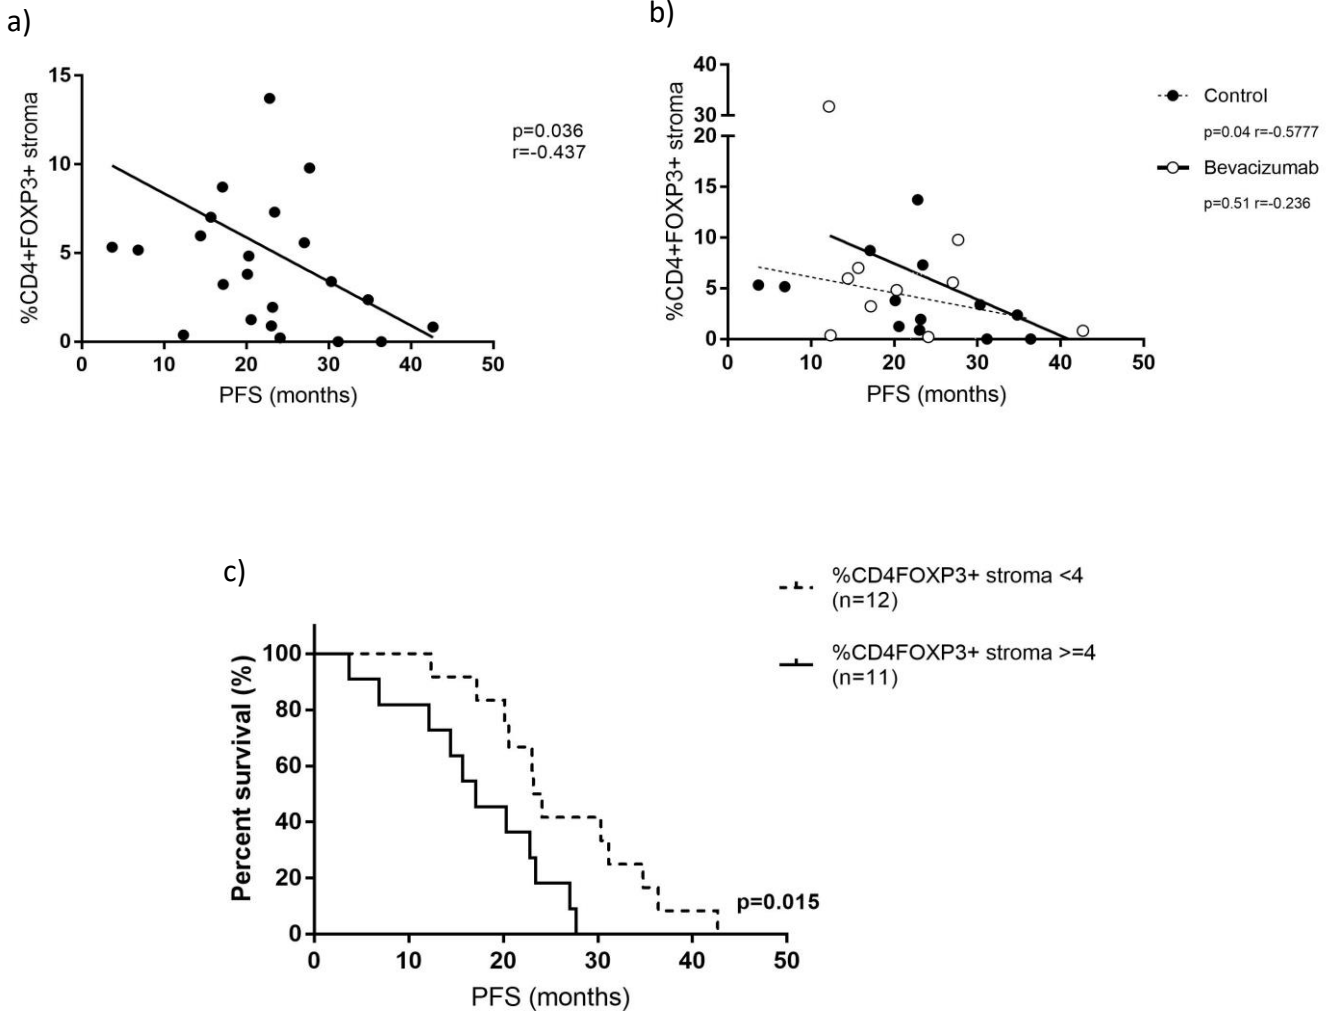

**Supplementary Figure 2. Association between progression free survival (PFS) and immune populations presence.**

**a)** Correlation between PFS and T cells in stroma. CD4+FOXP3+ cells were the only immune population associated with individual survival ( $p=0.036$ ) in the total population. **b)** Data analyzed divided by experimental group showed that subjects included in the placebo arm were the one driven this significance **c)** Kaplan-Meier curves relating CD4FOXP3+ presence and PFS, where CD4+FOXP3+ values higher than 4 (median cut-off) is significant associate with shorter PFS ( $p=0.015$ ).
