# Supplementary material for: Analysis of Tumor Microenvironment Changes after Neoadjuvant Chemotherapy with or without Bevacizumab in Advanced Ovarian Cancer (GEICO-89T/MINOVA Study)
Source: PubMed Central journal article supplement — Clin Cancer Res. 2023 Aug 1;30(1):176–86. doi: 10.1158/1078-0432.CCR-23-0771 (PMC10767307; doi:10.1158/1078-0432.ccr-23-0771), 2023-08-01
Supplement: ccr-23-0771_figure_s3_suppfs3.pdf [file ccr-23-0771_figure_s3_suppfs3.pdf]

a)

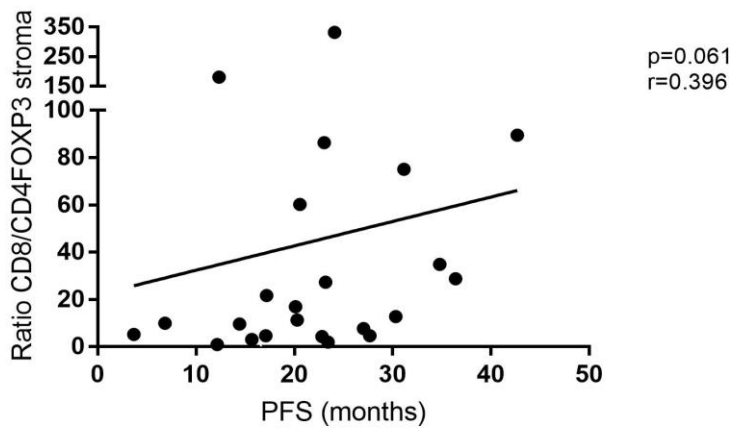

b)

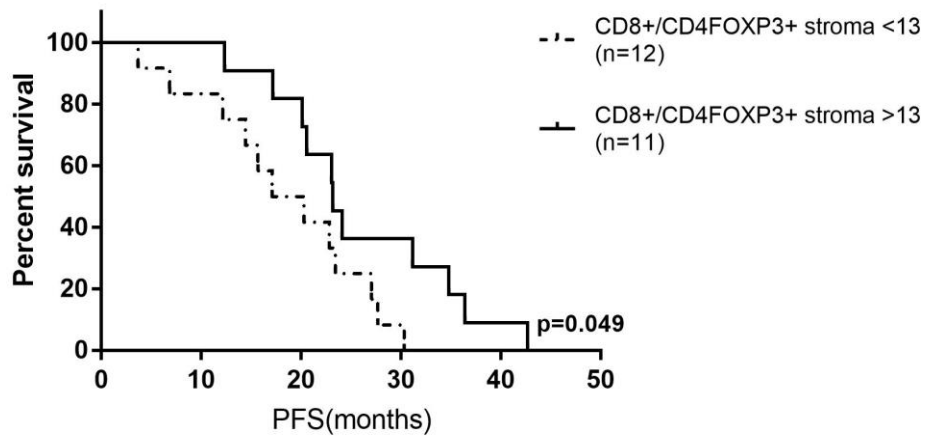

**Supplementary Figure 3. Association analysis between CD8+/CD4FOXP3+ ratio and progression free survival (PFS).**

**a)** Correlation between PFS and T cells in stroma. CD4+FOXP3+ cells were the only immune population associated with individual survival ( $p=0.036$ ) in the total population. **b)** Data analyzed divided by experimental group showed that subjects included in the placebo arm were the one driven this significance **c)** Kaplan-Meier curves regarding CD8+/CD4FOXP3+ ratio and PFS, where higher values than 13 (median cut-off) are associated with longer PFS ( $p=0.049$ ).
