# Supplementary material for: Analysis of Tumor Microenvironment Changes after Neoadjuvant Chemotherapy with or without Bevacizumab in Advanced Ovarian Cancer (GEICO-89T/MINOVA Study)
Source: PubMed Central journal article supplement — Clin Cancer Res. 2023 Aug 1;30(1):176–86. doi: 10.1158/1078-0432.CCR-23-0771 (PMC10767307; doi:10.1158/1078-0432.ccr-23-0771), 2023-08-01
Supplement: ccr-23-0771_supplementary_methods_1_suppsm1.pdf [file ccr-23-0771_supplementary_methods_1_suppsm1.pdf]

## Supplementary methods

### **1-Selection criteria and analysis of ROIs in ovarian cancer FFPE samples.**

Scanning areas selection was carried out basing on the criteria established by Wistuba et.al 2020 (PMID: 31972974), selecting 20 ROIs in each sample based on the available areas evaluated according to the TILs working group (PMID: 28777142):

- 1) Center of the tumor (selection of 10 fields)
- 2) Tumor invasion front (selection of 10 fields).
- 3) Intraepithelial TIL

In the subsequent analysis (Qu-path software) the subdivision of the 2 initial compartments into intraepithelial TILs (measured in the cytokeratin compartment) and stromal TILs was carried out. The same rationale was followed for TAMs image analysis.

A hematoxylin-eosin was carried out by the Department of Anatomy & Pathology of Clinica Universidad de Navarra, to establish the different areas of each sample and select the subsequent ROIs areas (tumor and stroma). For ROIs analysis, a maximum amount of 20 scan areas were scanned, when possible, using Phenochart software (v1.0.12). When not, alternatively a minimum of 5 ROIs according to described in the literature. In order to compare ROIs, areas selection was done based on the is homogeneity in the cellular composition in both compartments and the grade of immune cell infiltration when possible. Necrotic areas were excluded from the selection prior selection.
