# Supplementary material for: Analysis of Tumor Microenvironment Changes after Neoadjuvant Chemotherapy with or without Bevacizumab in Advanced Ovarian Cancer (GEICO-89T/MINOVA Study)
Source: PubMed Central journal article supplement — Clin Cancer Res. 2023 Aug 1;30(1):176–86. doi: 10.1158/1078-0432.CCR-23-0771 (PMC10767307; doi:10.1158/1078-0432.ccr-23-0771), 2023-08-01
Supplement: ccr-23-0771_table_s1_suppts1.pdf [file ccr-23-0771_table_s1_suppts1.pdf]

Supplementary table 1. Clinical characteristics of the patients included in the study diagnosed with epithelial ovarian cancer.

| Variable<br>median (min-max)    | Studied population<br>(n=23)          |                                              | Total Population<br>(n = 68)          |                                              |
|---------------------------------|---------------------------------------|----------------------------------------------|---------------------------------------|----------------------------------------------|
|                                 | Experimental<br>arm<br>Control (n=13) | Experimental<br>arm<br>Bevacizumab<br>(n=10) | Experimental<br>arm<br>Control (n=33) | Experimental<br>arm<br>Bevacizumab<br>(n=35) |
| Age                             | 64 (41-82)                            | 65(42-74)                                    | 57 (36–82)                            | 63 (33–78)                                   |
| ECOG PS, n (%)                  |                                       |                                              |                                       |                                              |
| 0                               | 4 (31)                                | 2 (20)                                       | 5 (15)                                | 8 (23)                                       |
| 1                               | 7 (54)                                | 8 (80)                                       | 21 (64)                               | 24 (69)                                      |
| 2                               | 2 (15)                                | 1 (10)                                       | 7 (21)                                | 3 (9)                                        |
| Origin of cancer, n (%)         |                                       |                                              |                                       |                                              |
| Ovary                           | 8 (62)                                | 9 (90)                                       | 25 (76)                               | 31 (89)                                      |
| Primary peritoneal              | 4 (31)                                | 1 (10)                                       | 7 (21)                                | 4 (11)                                       |
| Fallopian tube                  | 1 (7)                                 | 0                                            | 1 (3)                                 | 0                                            |
| FIGO stage, n (%)               |                                       |                                              |                                       |                                              |
| IIIC                            | 8 (62)                                | 9 (90)                                       | 22 (67)                               | 23 (66)                                      |
| IV                              | 5 (38)                                | 1 (10)                                       | 11 (33)                               | 12 (34)                                      |
| Histological subtype, n (%)     |                                       |                                              |                                       |                                              |
| Serous                          | 10 (77)                               | 9 (90)                                       | 26 (79)                               | 27 (77)                                      |
| Adenocarcinoma NOS              | 2 (15)                                | 1 (10)                                       | 5 (15)                                | 7 (20)                                       |
| Endometrioid/other              | 1(8)                                  | -                                            | 2 (6)                                 | 1 (3)                                        |
| Histological grade, n (%)       |                                       |                                              |                                       |                                              |
| Grade 3 (poorly differentiated) | 12 (92)                               | 10 (100)                                     | 32 (97)                               | 35 (100)                                     |
